## Fluid-dynamic characteristics of a bristled wing

S. Sunada<sup>1,\*</sup>, H. Takashima<sup>2</sup>, T. Hattori<sup>2</sup>, K. Yasuda<sup>2</sup> and K. Kawachi<sup>3</sup>

<sup>1</sup>National Institute of Industrial Science and Technology, Ministry of Economy, Trade and Industry, 1-2-1 Namiki, Ibaraki 305-8964, Japan, <sup>2</sup>Nihon University, 7-24-1 Narashinodai, Funabashi, Chiba 274-0081, Japan and

<sup>3</sup>Research Center for Advanced Science and Technology, University of Tokyo, 4-6-1 Komaba, Meguro, Tokyo 153-8904, Japan

\*Author for correspondence at present address: Osaka Prefecture University, 1-1 Gakuen-cho, Sakai, Osaka 599-8531, Japan  
(e-mail: sunada@aero.osakafu-u.ac.jp)

Accepted 6 June 2002

### Summary

Thrips fly at a chord-based Reynolds number of approximately 10 using bristled rather than solid wings. We tested two dynamically scaled mechanical models of a thrips forewing. In the bristled design, cylindrical rods model the bristles of the forewing; the solid design was identical to the bristled one in shape, but the spaces between the 'bristles' were filled in by membrane. We studied four different motion patterns: (i) forward motion at a constant forward velocity, (ii) forward motion at a translational acceleration, (iii) rotational motion at a

constant angular velocity and (iv) rotational motion at an angular acceleration. Fluid-dynamic forces acting on the bristled model wing were a little smaller than those on the solid wing. Therefore, the bristled wing of a thrips cannot be explained in terms of increased fluid-dynamic forces.

Key words: thrips, *Thripidae frankliniella*, bristled wing, membranous wing, fluid-dynamics, constant-velocity translation/rotation, accelerating translation/rotation.

### Introduction

Numerous animals use hairy appendages for feeding and locomotion. Extensive research has been carried out on the flow volume through the hairs on feeding appendages (e.g. Koehl, 1983, 1995; Hansen and Tiselius, 1992), but there is not much information on the fluid-dynamic forces generated by hairy appendages (Horridge, 1956; Ellington, 1980; Cheer and Koehl, 1987; Kuethe, 1975; Tanaka, 1995). How to estimate the fluid-dynamic forces acting on the hairy appendages at low and very low Reynolds number has not therefore been clarified.

To estimate the fluid-dynamic forces acting on the hairy appendages and understand the fluid-dynamic mechanisms of thrips flight, we measured the fluid-dynamic characteristics of a dynamically scaled model of the forewing. Four different wing motions were studied: forward motion at a constant velocity (constant-velocity translation), forward motion at a translational acceleration (accelerating translation), rotational motion at a constant angular velocity (constant-velocity rotation) and rotational motion at an angular acceleration (accelerating rotation). For comparison, the fluid-dynamic characteristics of a solid model wing were also measured. The solid wing had the same outline as the bristled model, but was made from a solid flat plate of the same thickness as the bristle diameter. Comparing the fluid-dynamic performance of the bristled and the solid wing might help to clarify why a small insect, such as a thrips, uses bristled wings for flight.

### Materials and methods

#### Wing shape

The fore- and hindwings of a real thrips *Thripidae frankliniella* intonsa are shown in Fig. 1A. Fig. 1B,C shows diagrams of the bristled wing and solid model wings, respectively. The bristled wing comprises a membrane and 51 cylinders. Table 1 lists the dimensions of a thrips' forewing, measured by Tanaka (1995), and of the model wings, where  $x_w$  is wing length,  $c$  is chord length,  $c_m$  is membrane width,  $d$  is cylinder diameter,  $c_{h1}$  is the length of cylinders on the leading edge of the membrane,  $c_{h2}$  is the length of cylinders on the trailing edge of the membrane,  $n$  is the number of cylinders on each edges,  $D$  is the distance between neighbouring cylinders, and  $S$  is the wing surface area.  $S$  for the bristled wing is the sum of the cylinder frontal area  $nd(c_{h1} + c_{h2})$  and the membrane area  $x_w c_m$ . The solid wing has a surface area  $x_w c$ . The parameters  $x_w/c$ ,  $c_m/c$ ,  $d/x_w$ ,  $c_{h1}/c$ ,  $c_{h2}/c$ ,  $n$  and  $D/d$  are similar for both the bristled wing and a real thrips' forewing, maintaining geometric scaling. The fluid-dynamic characteristics of the bristled wing and the solid wing were measured for four motion patterns.

#### Forward motion

Fig. 2 shows the apparatus used to measure the fluid-dynamic forces acting on the model wings in forward motion. A tank (dimensions in X, Y and Z directions,  $L_X=800$  mm,  $L_Y=400$  mm and  $L_Z=500$  mm, respectively) was filled with an

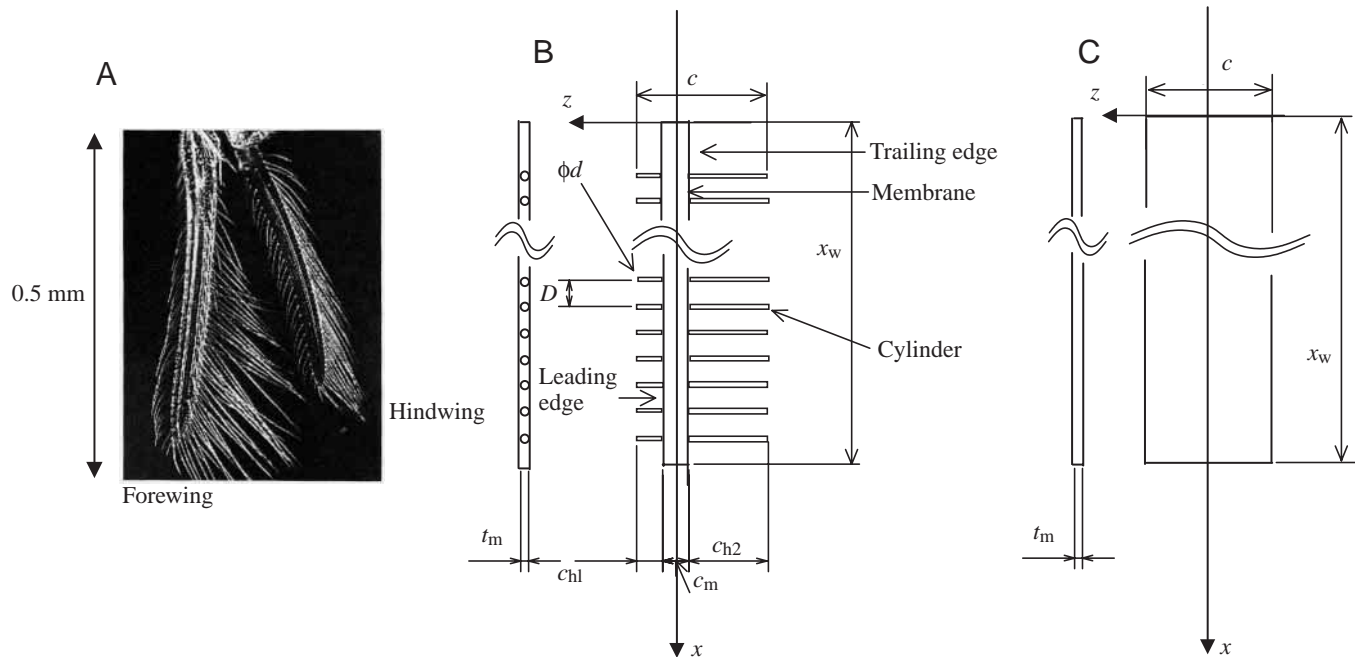

Fig. 1. Test wings. (A) Photomicrograph of a thrip's wings. (B,C) Diagrams of a bristled model wing (B) and a solid model wing (C).  $c$ , chord length of a wing;  $c_m$ , membrane width of a bristled wing;  $c_{h1}$ , length of cylinders on the leading edge;  $c_{h2}$ , length of cylinders on the trailing edge;  $D$ , distance between neighbouring cylinders or bristles;  $d$ , diameter of cylinders or bristles;  $t_m$ , thickness of a wing;  $x_w$ , wing length;  $x, y, z$ , wing-fixed coordinate system.

aqueous solution of glycerine. The wing was suspended from a load cell (LMC3729-1N, Nissho Electric Works, Japan) via an 8 mm diameter joint cylinder. The load cell can measure forces in the  $x$  and  $z$  directions,  $F_x$  and  $F_z$ , and the moment around the  $y$  axis,  $M_y$ . The maximum load for  $F_x$  and  $F_z$  was 1 N and that for  $M_y$  was 0.01 N m.

The cross talk between  $F_x$ ,  $F_z$  and  $M_y$  was small, and the measured forces  $F_x$  and  $F_z$  were considered to be equal to the normal and tangential forces,  $F_n$  and  $F_t$ , respectively, on the wing ( $F_x = F_n$ ,  $F_z = -F_t$ ).

The wing was moved in the  $X$  direction at a constant angle of attack  $\alpha$  between  $-10^\circ$  and  $45^\circ$  as described for constant-velocity translation and accelerating translation in Table 2. During constant-velocity translation, the wing moved at a constant forward velocity  $V_0$ . During accelerating translation, the wing underwent sinusoidal acceleration for  $t \leq T_{0t}$  ( $t \leq T_{0t} = 4$  or  $10$  s), where  $t$  is time and  $T_{0t}$  is the period of accelerated motion. The forward velocity reached a terminal value  $V_0$  at

$t = T_{0t}$ . Because the tank was much larger than the model wings, wall and surface effects can be ignored.

Table 2 also shows the Reynolds number  $Re$  calculated as follows:

$$Re = V_0 c / \nu, \quad (1)$$

where  $\nu$  is the kinematic viscosity of the liquid. During constant-velocity translation and accelerating translation,  $Re = 12$ , which is similar to the  $Re = 10$  for a flying thrips (Tanaka, 1995).

The fluid-dynamic forces acting on the wing were measured as follows. First, the normal and tangential forces  $F_{n,c}$  and  $F_{t,c}$  were measured for the wing mount only without the wing connected to the joint cylinder. Next, we measured the normal and tangential forces  $F_n$  and  $F_t$  generated by both the wing and its mount. The fluid-dynamic forces acting on the wing only were calculated from the measured forces,  $F_n$ ,  $F_t$ ,  $F_{n,c}$  and  $F_{t,c}$  for the two translational motions.

Table 1. Size of model wings and thrips' wing

| Wing           | $c$ (mm)           | $x_w/c$ | $d/c$              | $c_m/c$            | $c_{h1}/c$           | $c_{h2}/c$           | $t_m/c$   | $S$ (mm <sup>2</sup> ) | $D/d$ | $n$ |
|----------------|--------------------|---------|--------------------|--------------------|----------------------|----------------------|-----------|------------------------|-------|-----|
| Thrips*        | $3 \times 10^{-1}$ | 2.7     | $5 \times 10^{-3}$ | $2 \times 10^{-1}$ | $1.3 \times 10^{-1}$ | $6.7 \times 10^{-1}$ | —         | $6 \times 10^{-2}$     | 10    | 50  |
| Bristled model | 60                 | 3.0     | $5 \times 10^{-3}$ | $2 \times 10^{-1}$ | $1.8 \times 10^{-1}$ | $6.2 \times 10^{-1}$ | $10^{-2}$ | $2.9 \times 10^3$      | 10    | 51  |
| Solid model    | 60                 | 3.0     | —                  | —                  | —                    | —                    | $10^{-2}$ | $1.1 \times 10^4$      | —     | —   |

\*Data for the thrips' wing were obtained by Tanaka (1995).

$c$ , chord length;  $x_w$ , wing length;  $d$ , diameter of bristles or cylinders;  $c_m$ , membrane width;  $c_{h1}$ , length of bristles or cylinders on the leading edge;  $c_{h2}$ , length of bristles or cylinders on the trailing edge;  $t_m$ , thickness of the wing;  $S$ , wing surface area;  $D$ , distance between neighbouring bristles or cylinders;  $n$ , the number of bristles or cylinders.

### Constant-velocity translation

The forces  $F_n$ ,  $F_t$ ,  $F_{n,c}$  and  $F_{t,c}$  were measured when they reached constant values. The fluid-dynamic forces acting on the wing only were calculated using the expressions,  $F_n - F_{n,c}$  and  $F_t - F_{t,c}$ . The lift coefficient  $C_L$  and drag coefficient  $C_D$

were obtained by non-dimensionalizing the measured fluid-dynamic forces as follows:

$$C_L = [(F_n - F_{n,c})\cos\alpha - (F_t - F_{t,c})\sin\alpha]/0.5\rho V_0^2 S, \quad (2)$$

$$C_D = [(F_n - F_{n,c})\sin\alpha + (F_t - F_{t,c})\cos\alpha]/0.5\rho V_0^2 S. \quad (3)$$

### Accelerating translation

The forces  $F_n$ ,  $F_t$ ,  $F_{n,c}$  and  $F_{t,c}$  were measured at  $0 \leq t \leq T_{0t}$ .  $F_n$  and  $F_t$  are the sum of the fluid-dynamic and inertial forces acting on the joint cylinder, the fluid-dynamic and inertial forces acting on the wing and the inertial forces on the load cell.  $F_{n,c}$  and  $F_{t,c}$  are the sum of the fluid-dynamic and inertial forces acting on the joint cylinder and the inertial forces acting on the load cell. The load cell measured an inertial force proportional to the accelerated mass attached to the strain gauge in the load cell. Therefore,  $F_n - F_{n,c}$  and  $F_t - F_{t,c}$  are the sum of the fluid-dynamic and inertial forces acting on the wing. The normal and tangential fluid-dynamic forces acting only on the wing are given by  $F_n - F_{n,c} - m_w \ddot{X} \sin\alpha$  and  $F_t - F_{t,c} - m_w \ddot{X} \cos\alpha$ , respectively, where  $m_w$  is the mass of the wing, and  $m_w \ddot{X} \sin\alpha$  and  $m_w \ddot{X} \cos\alpha$  are the normal and tangential components, respectively, of the inertial force acting on the wing.  $C_L$  and  $C_D$  were obtained by non-dimensionalizing the measured fluid-dynamic forces as follows:

$$C_L = [(F_n - F_{n,c})\cos\alpha - (F_t - F_{t,c})\sin\alpha]/0.5\rho \dot{X}^2 S, \quad (4)$$

$$C_D = [(F_n - F_{n,c})\sin\alpha + (F_t - F_{t,c})\cos\alpha - m_w \ddot{X}]/0.5\rho \dot{X}^2 S. \quad (5)$$

### Rotational motion

Fig. 3 shows the apparatus used to measure the fluid-dynamic forces acting on the model wings in rotational

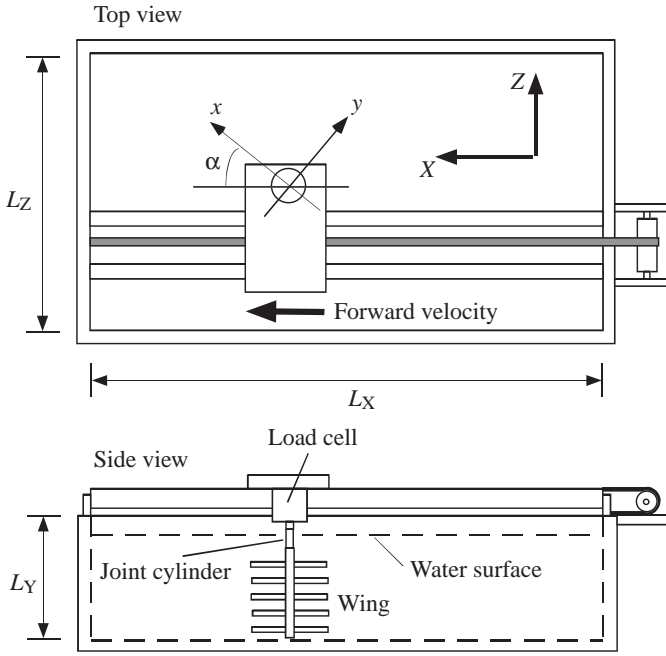

Fig. 2. Experimental apparatus used to measure the fluid-dynamic forces of a wing in forward motion (constant-velocity translation and accelerating translation).  $X, Y, Z$ , earth-fixed coordinate system;  $x, y, z$ , wing-fixed coordinate system;  $L_X, L_Y, L_Z$ , dimensions of the tank;  $\alpha$ , angle of attack.

Table 2. Wing motions

| Motion pattern                | Wing motions                                                                                                                                                                                          | Non-dimensional values                                                                                                                                                                                         |
|-------------------------------|-------------------------------------------------------------------------------------------------------------------------------------------------------------------------------------------------------|----------------------------------------------------------------------------------------------------------------------------------------------------------------------------------------------------------------|
| Constant-velocity translation | Displacement $X = V_0 t$ , $V_0 = 2.4 \times 10^{-2} \text{ m s}^{-1}$                                                                                                                                | Reynolds number $Re = \frac{V_0 c}{\nu} = 12$                                                                                                                                                                  |
| Accelerating translation      | Displacement $X = \frac{V_0}{2} \left( t - \frac{T_{0t}}{\pi} \sin \frac{t}{T_{0t}} \pi \right)$ , $0 \leq t \leq T_{0t}$<br>$V_0 = 2.4 \times 10^{-2} \text{ m s}^{-1}$ , $T_{0t} = 4, 10 \text{ s}$ | Reynolds number $Re = \frac{V_0 c}{\nu} = 12$<br>Non-dimensional total displacement $\frac{V_0 T_{0t}}{2c} = 0.8$ ( $T_{0t} = 4 \text{ s}$ ),<br>$\frac{V_0 T_{0t}}{2c} = 2$ ( $T_{0t} = 10 \text{ s}$ )       |
| Constant-velocity rotation    | Rotational angle $\phi = \omega t$ , $\omega = 0.2 \text{ rad s}^{-1}$                                                                                                                                | Reynolds number $Re = \frac{\left( \frac{3}{4} x_w \right) \omega c}{\nu} = 10$                                                                                                                                |
| Accelerating rotation         | Rotational angle $\phi = \frac{\Phi}{2} \left( 1 - \cos \left( \frac{t}{T_{0r}} \pi \right) \right)$ ,<br>$0 \leq t \leq T_{0r}$ , $\Phi = 2.3 \text{ rad}$ , $T_{0r} = 6.5 \text{ s}$                | Reynolds number $Re = \frac{\left( \frac{3}{4} x_w \right) \left( \frac{\pi}{2\sqrt{2} T_{0r}} \right) \frac{\Phi}{2} c}{\nu} = 9.6$<br>Amplitude of accelerating rotation $\frac{\Phi}{2} = 1.15 \text{ rad}$ |

$V_0$ , terminal forward velocity;  $t$ , time;  $T_{0t}$ , period of accelerated phase in translational motion;  $\omega$ , angular velocity for constant-velocity rotation;  $\Phi/2$ , amplitude of accelerating rotation;  $T_{0r}$ , period of accelerated phase in rotational motion;  $c$ , chord length;  $\nu$ , kinematic viscosity;  $x_w$ , wing length.

motion. The model wing was suspended in a tank ( $L_X$ ,  $L_Y=500$  mm and  $L_Z=1000$  mm) filled with an aqueous solution of glycerine. The wing was mounted onto a load cell (LMC2909, Nissho Electric Works, Japan) and a motor *via* a 6 mm diameter joint cylinder. The wing rotated around the joint cylinder in the  $X$ - $Y$  plane. The load cell measured force in the  $Z$  direction,  $F_z$ , and the moment around the  $Z$  axis,  $M_z$ . The maximum load was 5 N for  $F_z$  and 0.25 N m for  $M_z$ . When forces in the  $X$ ,  $Y$  and  $Z$  directions and moments around the  $X$ ,  $Y$  and  $Z$  axes act on the load cell, the output signal from the load cell,  $F_z$  and  $M_z$  are affected by all the forces and moments acting on the load cell. However, because the cross talk between  $F_z$  and  $M_z$  was small, measured values of  $F_z$  and  $M_z$  were considered to be equal to the force in the  $Z$  direction and the moment around the  $Z$  axis actually acting on the load cell, respectively.

The tank was filled to the depth  $L_{Z1}$  of 980 mm with an aqueous solution of glycerine. The rotational axis of the wing was at the centre of the tank in the  $X$ - $Y$  plane. The distance between the rotational plane and the bottom of the tank was  $0.7L_{Z1}$ . All tank dimensions are large enough for surface and wall effects to be negligible.

The geometrical angle of attack  $\alpha$  was defined as the angle between the  $Z$  axis and a vector normal to the wing. The angle of attack  $\alpha$  was set between  $-10^\circ$  and  $45^\circ$ .

Table 2 lists the rotational angle  $\phi$  during constant-velocity

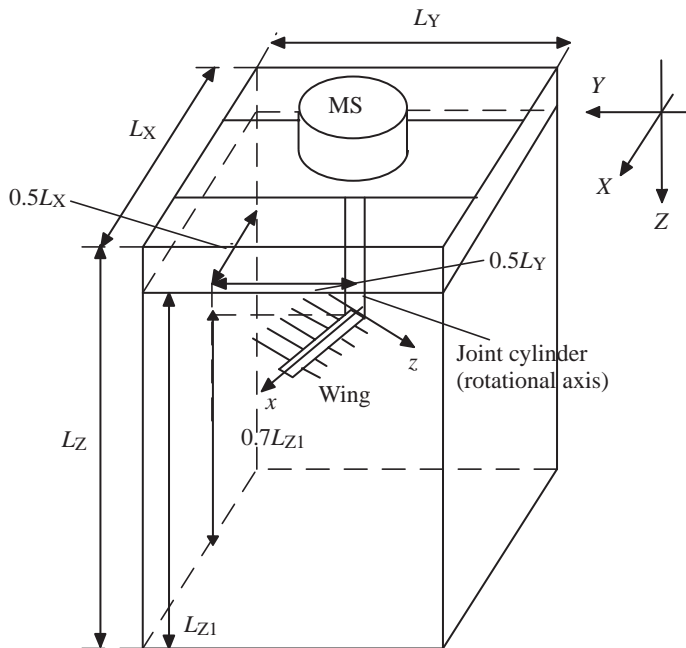

Fig. 3. Experimental apparatus used to measure the fluid-dynamic forces of a wing in rotational motion (constant-velocity rotation and accelerating rotation). The measuring system (MS) comprises a load cell and a motor.  $X$ ,  $Y$ ,  $Z$ , earth-fixed coordinate system;  $x$ ,  $y$ ,  $z$ , wing-fixed coordinate system;  $L_X$ ,  $L_Y$ ,  $L_Z$ , dimensions of the tank;  $L_{Z1}$ , depth of liquid;  $0.5L_X$ ,  $0.5L_Y$ ,  $0.5L_Z$ , position of a root of a wing.

rotation and accelerating rotation and lists  $Re$  defined for constant-velocity rotation as

$$Re = \frac{(3/4x_w)\omega c}{v}, \quad (6)$$

and for accelerating rotation,

$$Re = \frac{(3/4x_w)(\pi/2\sqrt{2}T_{0r})(\Phi/2)c}{v}, \quad (7)$$

where  $\omega$  is the rotational angular velocity for constant-velocity rotation,  $T_{0r}$  and  $\Phi/2$  are the period and amplitude, respectively, of accelerating rotation, and  $(\pi/2\sqrt{2}T_{0r})(\Phi/2)$  is the averaged angular velocity. For constant-velocity rotation and accelerating rotation,  $Re$  was approximately 10, which is close to the  $Re$  for a flying thrips (Tanaka, 1995).

#### Constant-velocity rotation

We measured the force in the  $-Z$  direction, i.e. thrust  $T$ , and the moment around the  $Z$  axis, i.e. torque  $Q$ , after the wing had completed 30 rotations. The measured  $T$  and  $Q$  were considered to be equal to the fluid-dynamic thrust and torque of the wing because the forces acting on the joint cylinder were much smaller than those acting on the wing.  $C_L$  and  $C_D$  were determined by non-dimensionalizing the measured fluid-dynamic thrust and torque as follows (Ellington, 1984):

$$C_L = T/0.5\rho \int_0^{x_w} (x\omega)^2 c(x) dx, \quad (8)$$

$$C_D = Q/0.5\rho \int_0^{x_w} (x\omega)^2 xc(x) dx. \quad (9)$$

where  $x$  is span-wise axis, shown in Fig. 1.

#### Accelerating rotation

Thrust  $T$  and torque  $Q$  were measured for  $0 \leq t \leq T_{0r}$  in an aqueous solution of glycerine. As in the case of constant-velocity rotation, we neglected the forces acting on the joint cylinder and assumed that the measured thrust  $T$  is equal to the fluid-dynamic thrust. The measured torque is the sum of the fluid-dynamic torque acting on both the wing and the joint cylinder, as well as the inertial torque acting on the wing, on the joint cylinder and on the load cell. Because the fluid-dynamic torque acting on the joint cylinder is much smaller than that acting on the wing, the former torque can be neglected. We measured the torque in air to estimate the inertial torque acting on the wing, on the joint cylinder and on the load cell. The measured torque in air,  $Q_c$ , was approximately equal to the inertial torque acting on the wing, on the joint cylinder and on the load cell because their density is much larger than the density of air and, hence, the fluid-dynamic torque in air was much smaller than the inertial torque acting on these three components (wing, joint cylinder and load cell). Therefore, the fluid-dynamic torque acting on the wing was obtained from  $Q - Q_c$ .

$C_L$  and  $C_D$  were determined by non-dimensionalizing the measured fluid-dynamic thrust and torque as follows (Ellington, 1984):

$$C_L = T/0.5\rho \int_0^{x_w} (x\dot{\phi})^2 c(x) dx, \quad (10)$$

and

$$C_D = (Q - Q_c)/0.5\rho \int_0^{x_w} (x\dot{\phi})^2 xc(x) dx, \quad (11)$$

where  $\dot{\phi}$  is the instantaneous angular velocity.

### Results

Fig. 4 compares the fluid-dynamic forces for the steady motions, constant-velocity translation and constant-velocity rotation, and shows the ratio of lift  $L$  acting on the bristled wing to that acting on the solid wing and the ratio of drag  $D$  acting on the bristled wing to that acting on the solid wing for constant-velocity translation. Also shown is the ratio of thrust  $T$  acting on the bristled wing to that acting on the solid wing and the ratio of torque  $Q$  acting on the bristled wing to that acting on the solid wing, for constant-velocity rotation. The ratios of lift, drag, thrust and torque acting on the bristled wing to those on the solid wing were a little less than 1, except for constant-velocity rotation ( $T$ ; at  $\alpha=10^\circ$  and  $20^\circ$ ). During steady motion (constant-velocity translation and constant-velocity rotation), the fluid-dynamic forces acting on the bristled wing were smaller than those acting on the solid wing, except for constant-velocity rotation ( $T$ ; at  $\alpha=10^\circ$  and  $20^\circ$ ).

Fig. 5 shows  $C_L$  and  $C_D$  plotted *versus*  $\alpha$  for constant-velocity translation and constant-velocity rotation. For both motions,  $C_L$  and  $C_D$  of the bristled wing were larger than those of the solid wing. The differences in  $C_L$  and  $C_D$  between

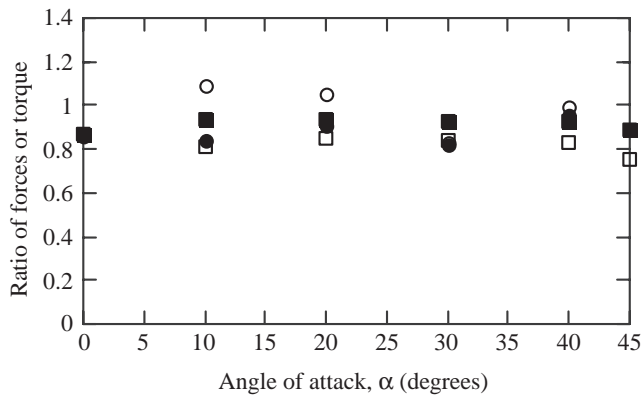

Fig. 4. Ratio of forces (lift  $L$ , drag  $D$  in constant-velocity translation and thrust  $T$  in constant-velocity rotation) or torque ( $Q$  in constant-velocity rotation) acting on the bristled wing to those on the solid wing. Open squares,  $L$ , filled squares,  $D$ , in constant-velocity translation; open circles,  $T$ , filled circles,  $Q$ , in constant-velocity rotation.

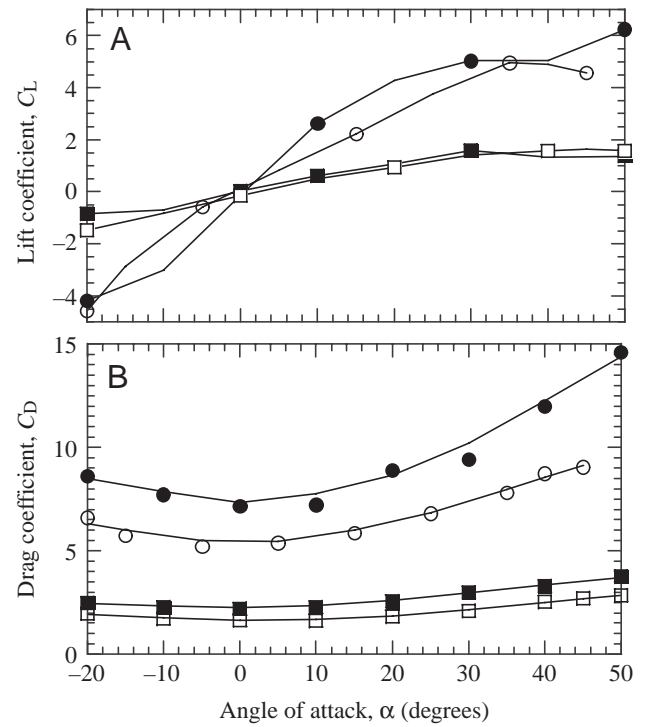

Fig. 5. Lift coefficient  $C_L$  (A) and drag coefficient  $C_D$  (B) for steady motion (constant-velocity translation and constant-velocity rotation). Open circles, the bristled wing in constant-velocity translation; filled circles, the bristled wing in constant-velocity rotation; open squares, the solid wing in constant-velocity translation; filled squares, the solid wing in constant-velocity rotation.

constant-velocity rotation and constant-velocity translation for the bristled wing are larger than those for the solid wing. Hence, the flow around the bristled wing should exhibit large differences between constant-velocity rotation and constant-velocity translation than the solid wing. Fig. 6 shows how lift and drag change with distance travelled for the solid wing

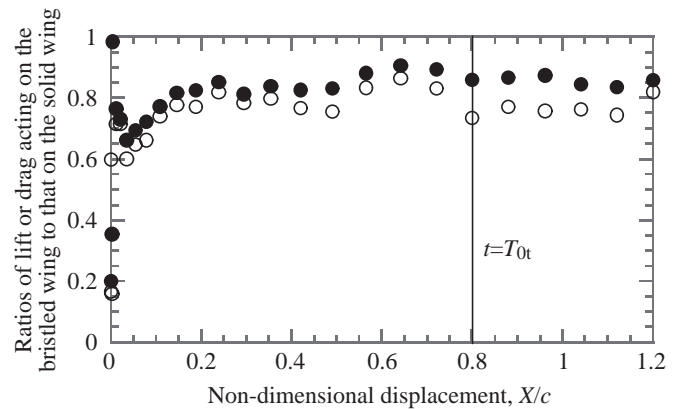

Fig. 6. Ratios of lift (open circles) and drag (filled circles) acting on the bristled wing in accelerating translation ( $T_{0t}=4$  s and  $\alpha=45^\circ$ ) to those on the solid wing.  $t$ , time (s);  $T_{0t}$ , period of acceleration phase in translational motion;  $\alpha$ , angle of attack.



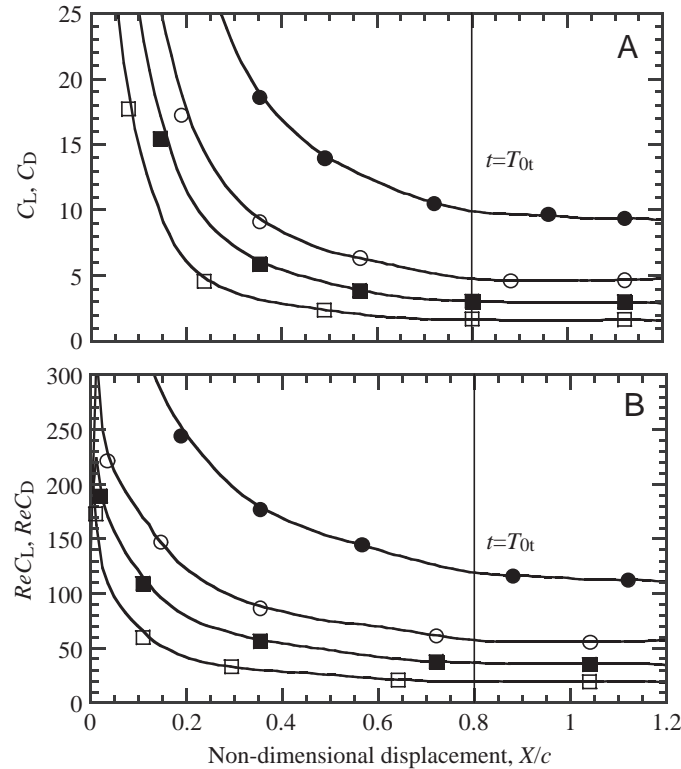

Fig. 7. Changes in time of  $C_L$  and  $C_D$  (A) and those of  $ReC_L$  and  $ReC_D$  (B) for accelerating translation, when  $T_{0t}=4$  s and  $\alpha=45^\circ$ .  $t$ , time (s);  $T_{0t}$ , period of acceleration phase in translational motion;  $\alpha$ , angle of attack. Open circles,  $C_L$  or  $ReC_L$  for the bristled wing; filled circles,  $C_D$  or  $ReC_D$  for the bristled wing; open squares,  $C_L$  or  $ReC_L$  for the solid wing; filled squares,  $C_D$  or  $ReC_D$  for the solid wing.

during accelerating translation ( $\alpha=45^\circ$  and  $T_{0t}=4$  s). The lift-to-drag ratio was between 0.8 and 1. During this unsteady translation, the fluid-dynamic forces acting on the bristled wing were smaller than those acting on the solid wing. Fig. 7A shows how  $C_L$  and  $C_D$  vary with distance travelled for accelerating translation when  $\alpha=45^\circ$  and  $T_{0t}=4$  s. When  $t=T_{0t}$ , the non-dimensional displacement  $X/c$  was approximately 0.8. The figure shows that neither  $C_L$  nor  $C_D$  reached a constant value when  $t=T_{0t}$  and that the forward velocity  $\dot{X}$  reached its terminal value  $V_0$ . Furthermore,  $C_L$  and  $C_D$  were larger for  $t \leq T_{0t}$  than at  $t=T_{0t}$ . Fluid-dynamic forces due to added mass (Ellington, 1984), which act on the wings when  $t < T_{0t}$ , are negligible. The larger values of  $C_L$  and  $C_D$  for  $t \leq T_{0t}$  might be explained in two ways. First,  $Re$  defined by instantaneous forward velocity  $\dot{X}$  was smaller for  $t < T_{0t}$  than at  $t=T_{0t}$ . For  $Re < 10^3$ ,  $C_L$  and  $C_D$ , which are non-dimensionalized by  $\dot{X}^2$ , increase as  $Re$  decreases. For  $Re < 1$ ,  $C_L$  and  $C_D$  are proportional to  $1/Re$  and  $ReC_L$  and  $ReC_D$  are independent of  $Re$  (e.g. Hoerner, 1965). Second, wing motion accelerated while  $t \leq T_{0t}$ , and this acceleration caused an increase in  $C_L$  and  $C_D$ . This increase is expected to be caused by ‘delayed stall’ (Dickinson et al., 1999).

To test the first hypothesis, we looked at how  $ReC_L$  and  $ReC_D$  changed over time for accelerating translation when

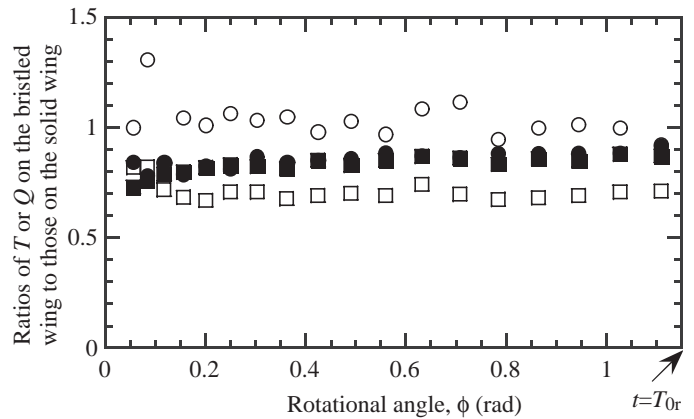

Fig. 8. Ratios of thrust  $T$  and torque  $Q$  acting on the bristled wing in accelerating rotation ( $\alpha=20^\circ$  and  $\alpha=45^\circ$ ) to those on the solid wing.  $t$ , time (s);  $T_{0r}$ , period of acceleration phase in rotational motion;  $\alpha$ , angle of attack. Open circles,  $T$  at  $\alpha=20^\circ$ ; filled circles,  $Q$  at  $\alpha=20^\circ$ ; open squares,  $T$  at  $\alpha=45^\circ$ ; filled squares,  $Q$  at  $\alpha=45^\circ$ .

$\alpha=45^\circ$  and  $T_{0t}=4$  s (Fig. 7B). These changes over time were smaller than those of  $C_L$  and  $C_D$  shown in Fig. 7A. However,  $ReC_L$  and  $ReC_D$  were larger for  $t < T_{0t}$  than at  $t=T_{0t}$ . Therefore, the second hypothesis is also needed to explain the differences in  $C_L$  and  $C_D$  for  $t < T_{0t}$  than at  $t=T_{0t}$ . This might apply not just for  $T_{0t}=4$  s but also for  $T_{0t}=10$  s.

Fig. 8 shows the changes over time of the ratios of thrust  $T$  and torque  $Q$  acting on the bristled wing to those acting on the solid wing for accelerating rotation for  $\alpha=20^\circ$  and  $45^\circ$ . These ratios were less than 1, except for the ratio at  $\alpha=20^\circ$ , when the fluid-dynamic forces acting on the bristled wing were larger than those acting on the solid wing.

Fig. 9A shows changes over time of  $C_L$  and  $C_D$  for accelerating rotation when  $\alpha=45^\circ$ . The coefficients  $C_L$  and  $C_D$  of the solid wing were smaller than those of the bristled wing. The  $C_L$  and  $C_D$  for  $t < T_{0r}$  were larger than those at  $t=T_{0r}$ . The fluid-dynamic forces due to added mass (Ellington, 1984) are negligible while  $t < T_{0r}$ . The changes over time of  $ReC_L$  and  $ReC_D$  in Fig. 9B show the differences in  $C_L$  and  $C_D$  for  $t < T_{0r}$  and  $t=T_{0r}$ . Just as during accelerating translation,  $ReC_L$  and  $ReC_D$  are larger for  $t < T_{0r}$ , and again this difference is due to delayed stall.

## Discussion

Fluid-dynamic forces acting on the geometrically scaled bristled model wing were smaller than those acting on the solid wing. With a few exceptions, this result was valid for all the four wing motions: (i) forward motion at a constant forward velocity, (ii) forward motion at a translational acceleration, (iii) rotational motion at a constant angular velocity and (iv) rotational motion at an angular acceleration. The bristled wings of a thrips cannot therefore be explained by an augmentation of fluid-dynamic performance.

Fig. 10A shows the relationship between mass  $m$  and wing-beat frequency  $f$  for a thrips (Tanaka, 1995) and a variety of

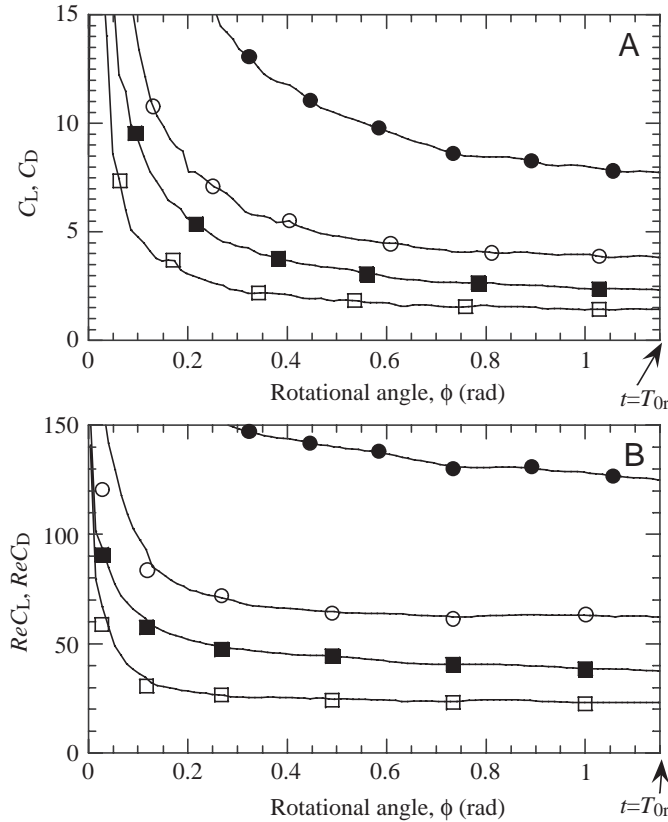

Fig. 9. Changes in time of  $C_L$  and  $C_D$  (A) and  $ReC_L$  and  $ReC_D$  (B) for accelerating rotation, when  $\alpha=45^\circ$ .  $t$ , time (s);  $T_{Or}$ , period of accelerated phase in rotational motion;  $\alpha$ , angle of attack. Open circles,  $C_L$  or  $ReC_L$  for the bristled wing; filled circles,  $C_D$  or  $ReC_D$  for the bristled wing; open squares,  $C_L$  or  $ReC_L$  for the solid wing; filled squares,  $C_D$  or  $ReC_D$  for the solid wing.

other insects (Azuma, 1992). The wing-beat frequency  $f$  of the thrips is 200 Hz, which is relatively low for its body mass ( $m \approx 6 \times 10^{-8}$  kg) compared with larger insects, but similar to that of other small insects, such as *Bemisia tabaci*, *Aleurothrixus floccosus*, *Aphis gossypii* and *Acyrtosiphon kondoi* (numbered 1–4 in Fig. 10A, respectively). Fig. 10B shows the values of  $mg/S_{tot}(x_w f)^2$  for the insects listed in Fig. 10A, where  $g$  is the acceleration due to gravity,  $S_{tot}$  is the total wing surface area of four wings of an insect, and  $x_w$  is the length of the forewing. The fluid-dynamic force generated by a wing is proportional to  $S_{tot}(x_w f)^2$ , where  $x_w f$  is proportional to the mean velocity of the flow around the wing. Therefore, the parameter  $mg/S_{tot}(x_w f)^2$  reflects the coefficient of vertical fluid-dynamic force generated by an insect. For the thrips  $mg/S_{tot}(x_w f)^2 \approx 25$ ; this is larger than that for *Bemisia tabaci*, *Aleurothrixus floccosus*, *Aphis gossypii* and *Acyrtosiphon kondoi*, which have membranous wings. The larger value of  $mg/S_{tot}(x_w f)^2 \approx 25$  for thrips can be explained by the larger values of  $C_L$  and  $C_D$  for a bristled model wing compared with the coefficients for the solid model wing.

The resultant force of the lift and drag generated by the thrips was approximately  $5 \times 10^7$  N at any flapping angle with

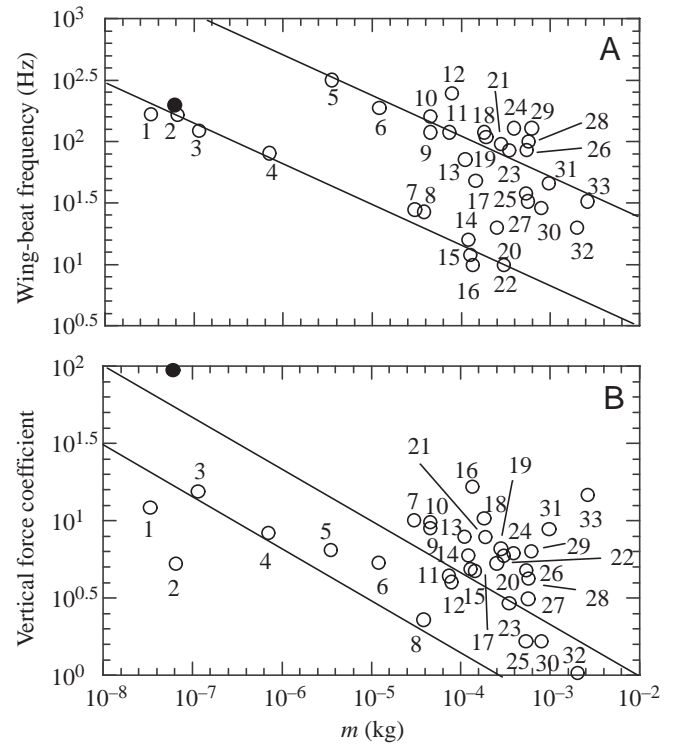

Fig. 10. Comparison of flight data for a thrip and for other insects. (A) mass (kg)  $m$  versus wing-beat frequency (Hz)  $f$ , (B) mass (kg)  $m$  versus a parameter indicating vertical force coefficient  $mg/S_{tot}(x_w f)^2$ . Data for the thrips (filled circle) are from Tanaka (1995). Data for the following insects (open circles) are from Azuma (1992): <sup>1</sup>*Bemisia tabaci*, <sup>2</sup>*Aleurothrixus floccosus*, <sup>3</sup>*Aphis gossypii*, <sup>4</sup>*Acyrtosiphon kondoi*, <sup>5</sup>*Aedes nearcticus*, <sup>6</sup>*Musca domestica*, <sup>7</sup>*Panorpa communis* L., <sup>8</sup>*Pyrosoma minimum* Harr., <sup>9</sup>*Amonophila sabulosa* V.del., <sup>10</sup>*Sarcophaga carnaria* L., <sup>11</sup>*Volucella pellucens* Meig., <sup>12</sup>*Apis mellifica* L., <sup>13</sup>*Telepharus fuscus*, <sup>14</sup>*Calopteryx splendens* Harr., <sup>15</sup>*Pieris brassica* L., <sup>16</sup>*Vanessa atalanta* L., <sup>17</sup>*Plusia gamma* L., <sup>18</sup>*Talanus affioris*, <sup>19</sup>*Vespa germanica*, <sup>20</sup>*Orthetrum caeruleum* Fabr., <sup>21</sup>*Tabanus botinus*, <sup>22</sup>*Papilio podalirius*, <sup>23</sup>*Macroglossa stellatorum* L., <sup>24</sup>*Bombus terrestris* Fabr., <sup>25</sup>*Aeschna mixta* Latr., <sup>26</sup>*Cetonia aurata*, <sup>27</sup>*Brachytron pratense* Mull., <sup>28</sup>*Vespa crabro* L., <sup>29</sup>*Xylocopa violacea*, <sup>30</sup>*Anax parthenope*, <sup>31</sup>*Melolontha vulgaris* Fabr., <sup>32</sup>*Schistocerca gregaria*, <sup>33</sup>*Lucanus corcus*.

the following assumptions: (i) the thrips has four wings whose size is shown in Table 1; (ii) the flapping motion is the same as defined for the accelerating rotation at  $f=200$  Hz; and (iii) the geometrical angle of attack is  $45^\circ$ , and changes over time in the lift and drag coefficients are given by those of the bristled wing in Fig. 9A. The estimated value of the vector sum of lift and drag is close to the gravitational force acting on the thrips ( $6 \times 10^7$  N). However, to understand more fully the flight of the thrips, we need a more precise estimate of the fluid-dynamic forces generated by their wings, based on more accurate data on wing morphology and kinematics, on the variation in angle of attack (feathering angle), and lift and drag coefficients measured over several consecutive wing beats.

## List of symbols

|                    |                                                                                                       |
|--------------------|-------------------------------------------------------------------------------------------------------|
| $c$                | Chord length of a wing                                                                                |
| $c_m$              | Membrane width of a bristled wing                                                                     |
| $c_{h1}$           | Length of cylinders or bristles attached at the leading edge of the bristled wing                     |
| $c_{h2}$           | Length of cylinders or bristles attached at the trailing edge of the bristled wing                    |
| $C_L, C_D$         | Lift and drag coefficients, respectively                                                              |
| $d$                | Diameter of cylinders or bristles                                                                     |
| $D$                | Distance between neighbouring cylinders or bristles                                                   |
| $f$                | Wing-beat frequency                                                                                   |
| $F_n, F_t$         | Normal and tangential forces, respectively                                                            |
| $F_{n,c}, F_{t,c}$ | Normal and tangential forces, respectively, measured on the wing mount without a wing connected to it |
| $F_Z, M_Z$         | Force in Z axis and moment around Z axis, respectively                                                |
| $F_x, F_z, M_y$    | Forces in $x, z$ axes and moment around $y$ axis, respectively                                        |
| $g$                | Acceleration of gravity                                                                               |
| $L_X, L_Y, L_Z$    | Dimensions of the tank                                                                                |
| $L_{Z1}$           | Depth of liquid                                                                                       |
| $m$                | Mass of an insect                                                                                     |
| $m_w$              | Mass of a wing                                                                                        |
| $n$                | The number of cylinders or bristles of a bristled wing                                                |
| $Q$                | Torque                                                                                                |
| $Q_c$              | Torque measured in air                                                                                |
| $Re$               | Reynolds number                                                                                       |
| $S$                | Wing surface area                                                                                     |
| $S_{tot}$          | Total wing surface area of an insect                                                                  |
| $t$                | Time                                                                                                  |
| $t_m$              | Thickness of a wing                                                                                   |
| $T$                | Thrust                                                                                                |
| $T_{0r}$           | Period of accelerated phase in rotational motion                                                      |
| $T_{0t}$           | Period of accelerated phase in translational motion                                                   |
| $V_0$              | Terminal forward velocity                                                                             |
| $x, y, z$          | Wing-fixed coordinate system                                                                          |
| $x_w$              | Wing length                                                                                           |

|           |                                                 |
|-----------|-------------------------------------------------|
| $X, Y, Z$ | Earth-fixed coordinate system                   |
| $\alpha$  | Angle of attack                                 |
| $\nu$     | Kinematic viscosity                             |
| $\rho$    | Density of fluid                                |
| $\Phi/2$  | Amplitude of accelerating rotational motion     |
| $\Phi$    | Rotational angle                                |
| $\omega$  | Angular velocity for constant-velocity rotation |

We would like to thank the anonymous referees for their critical and important comments on the manuscript. This research was financially supported by the Research and Development for Applied Advanced Computational Science and Technology of the Japan Science and Technology Corporation.

## References

- Azuma, A.** (1992). *The Biokinetics of Flying and Swimming*. Tokyo: Springer-Verlag.
- Cheer, A. Y. L. and Koehl, M. A. R.** (1987). Paddles and rakes: fluid flow through bristled appendages of small organisms. *J. Theor. Biol.* **129**, 17–39.
- Dickinson, M. H., Lehmann, F. and Sane, S. P.** (1999). Wing rotation and the aerodynamic basis of insect flight. *Science* **284**, 1954–1960.
- Ellington, C. P.** (1980). Wing mechanics and take-off preparation of thrips (Thysanoptera). *J. Exp. Biol.* **85**, 129–136.
- Ellington, C. P.** (1984). The aerodynamics of hovering flight. II. Morphological parameters. *Phil. Trans. R. Soc. Lond. B* **305**, 17–40.
- Hansen, B. and Tiselius, P.** (1992). Flow through the feeding structures of suspension feeding zooplankton: a physical model approach. *J. Plankton Res.* **14**, 821–834.
- Hoerner, S. F.** (1965). *Fluid-dynamic Drag*. Midland Park, NJ: Published by the author.
- Horridge, G. A.** (1956). The flight of very small insects. *Nature* **178**, 1334–1335.
- Koehl, M. A. R.** (1983). The morphology and performance of suspension-feeding appendages. *J. Theor. Biol.* **105**, 1–11.
- Koehl, M. A. R.** (1995). Fluid flow through hair-bearing appendages: feeding, smelling and swimming at low and intermediate Reynolds numbers. In *Biological Fluids Dynamics* (ed. C. P. Ellington and T. J. Pedley). *Symp. Soc. Exp. Biol.* **49**, 157–182. Cambridge: Company of Biologists.
- Kuethe, A. M.** (1975). On the mechanics of flight of small insects. In *Swimming and Flying in Nature*, vol. 2 (ed. T. Y. T. Wu, C. J. Brokaw and C. Brennen), pp. 803–813. New York: Plenum.
- Tanaka, S.** (1995). Thrips' flight. Part 1. In *Symposia '95 of Exploratory Research for Advanced Technology, Japan Science and Technology Corporation*, Abstracts (ed. K. Kawachi), pp. 27–34. Tokyo: Japan Science and Technology Corporation (in Japanese).
